# Supplementary material for: Neonatal apneic phenotype in a murine congenital central hypoventilation syndrome model is induced through non‐cell autonomous developmental mechanisms
Source: PubMed Central journal article supplement (PMC7881415; doi:10.1111/bpa.12877), 2020-08-04
Supplement: NIHMS1659334-supplement-S1.pdf [file NIHMS1659334-supplement-S1.pdf]

**A**

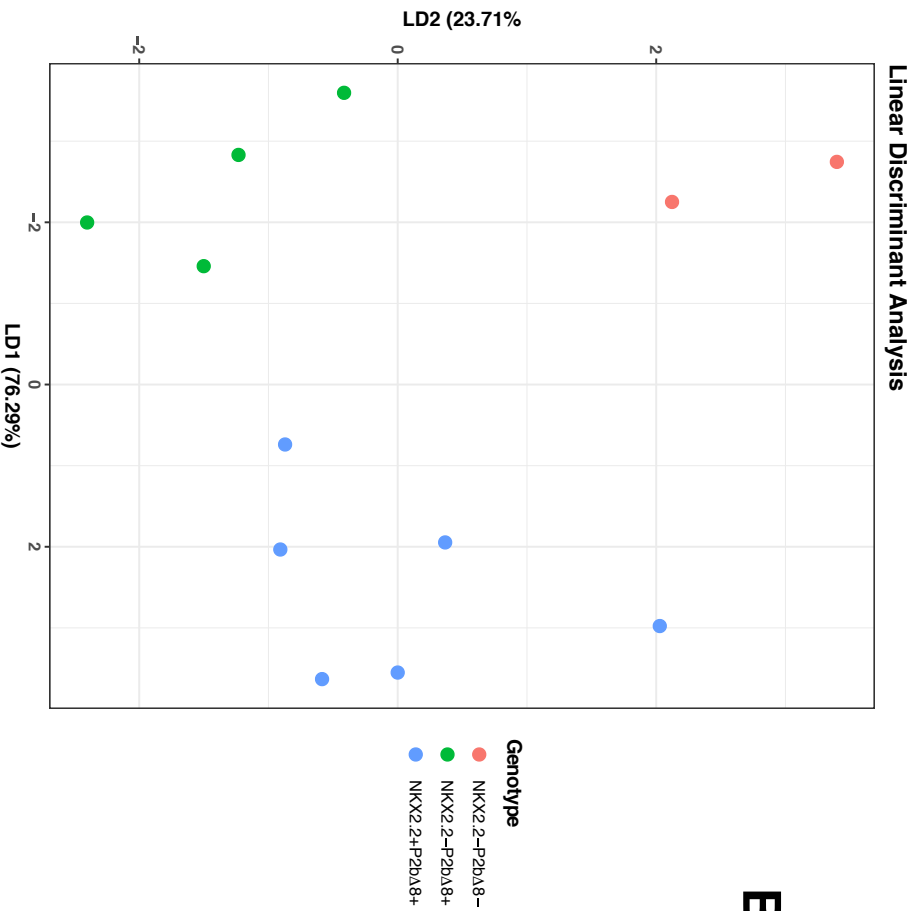

**B** Machine Learning Prediction Trained on data excluding NKX2.2-P2bΔ8- data

| Reference Genotype    | Predicted Genotype, RF Model | Predicted Genotype, SVM Model | Predicted Genotype, KNN Model | Predicted Genotype, LDA Model |
|-----------------------|------------------------------|-------------------------------|-------------------------------|-------------------------------|
| Control NKX2.2-P2bΔ8- | Control NKX2.2-P2bΔ8+        | Control NKX2.2-P2bΔ8+         | Control NKX2.2-P2bΔ8+         | Control NKX2.2-P2bΔ8+         |
| Control NKX2.2-P2bΔ8- | Control NKX2.2-P2bΔ8+        | Control NKX2.2-P2bΔ8+         | Control NKX2.2-P2bΔ8+         | Control NKX2.2-P2bΔ8+         |
