# Supplementary material for: Neonatal apneic phenotype in a murine congenital central hypoventilation syndrome model is induced through non‐cell autonomous developmental mechanisms
Source: PubMed Central journal article supplement (PMC7881415; doi:10.1111/bpa.12877), 2020-08-04

# Adult Mice Hyperoxic Hypercapnia (HH) (Control vs *Olig3<sup>Cre</sup>*, *Phox2b<sup>Δ8</sup>*)

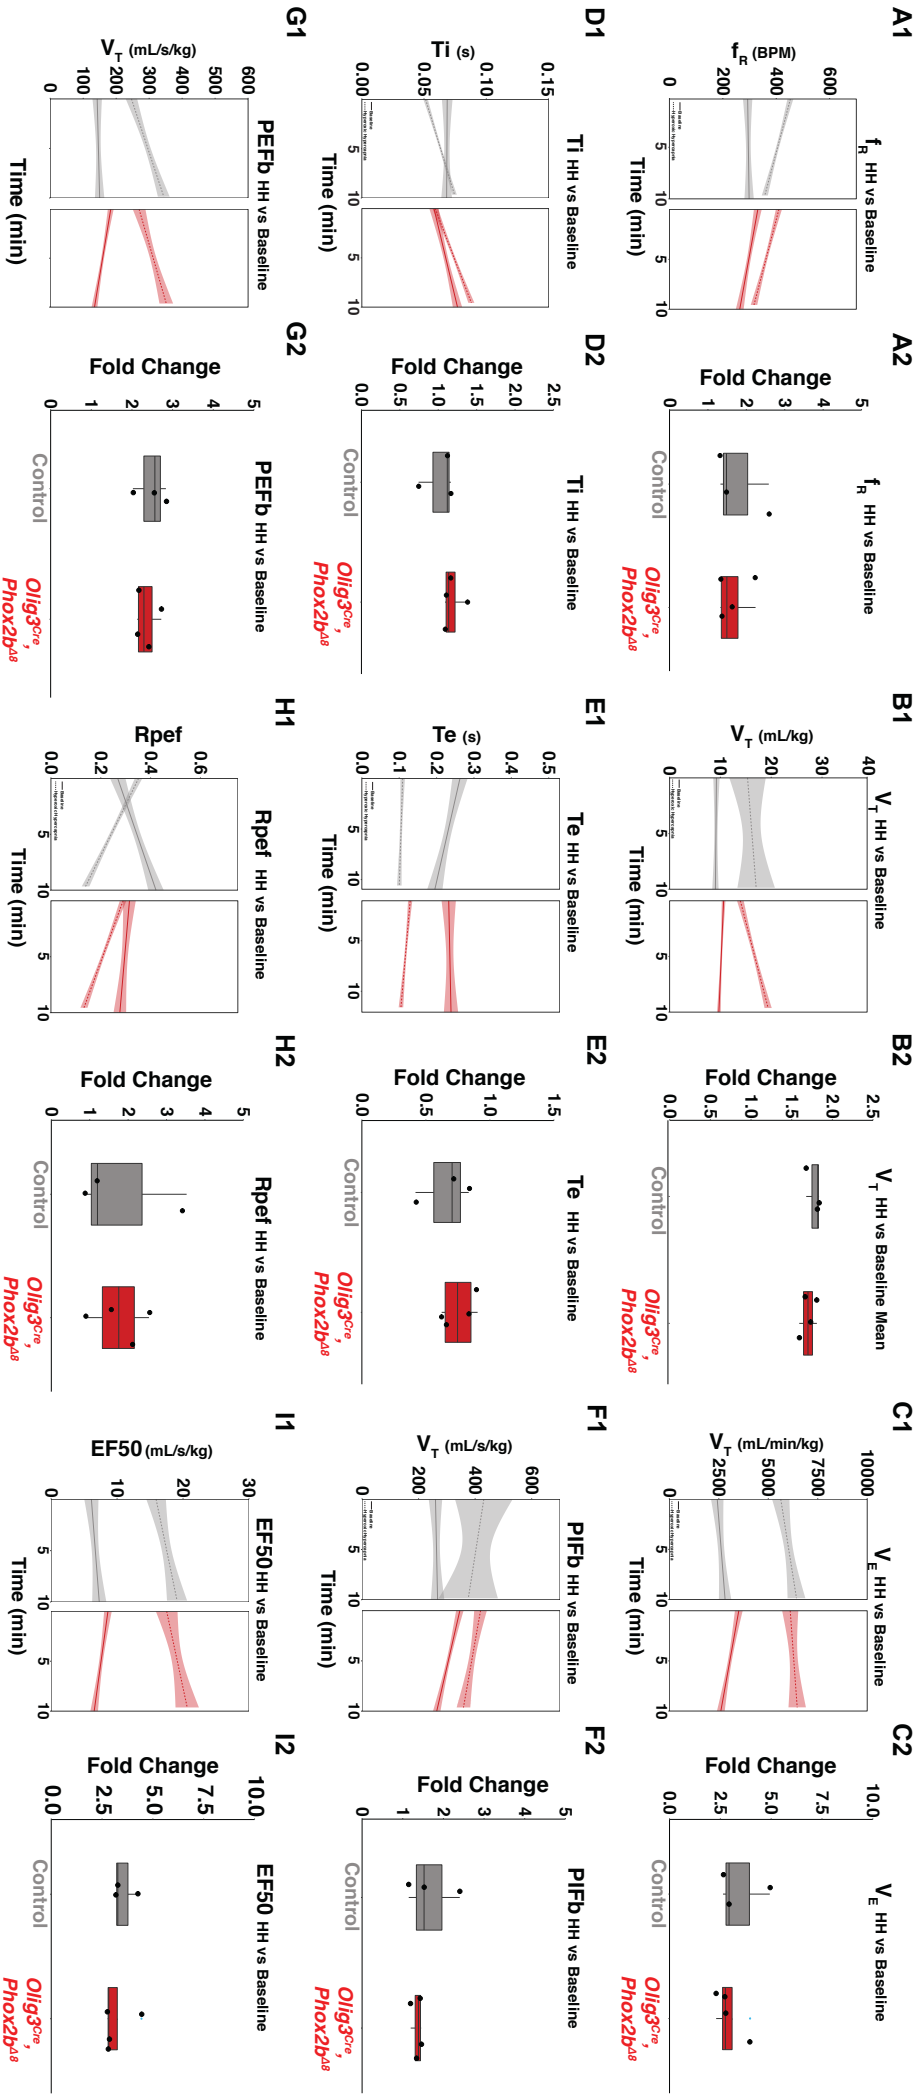

Supplement: NIHMS1659334-supplement-S3.pdf [file NIHMS1659334-supplement-S3.pdf]
