# Supplementary material for: Neonatal apneic phenotype in a murine congenital central hypoventilation syndrome model is induced through non‐cell autonomous developmental mechanisms
Source: PubMed Central journal article supplement (PMC7881415; doi:10.1111/bpa.12877), 2020-08-04

# Alzate, Liu, et al., Supplementary Figure 9

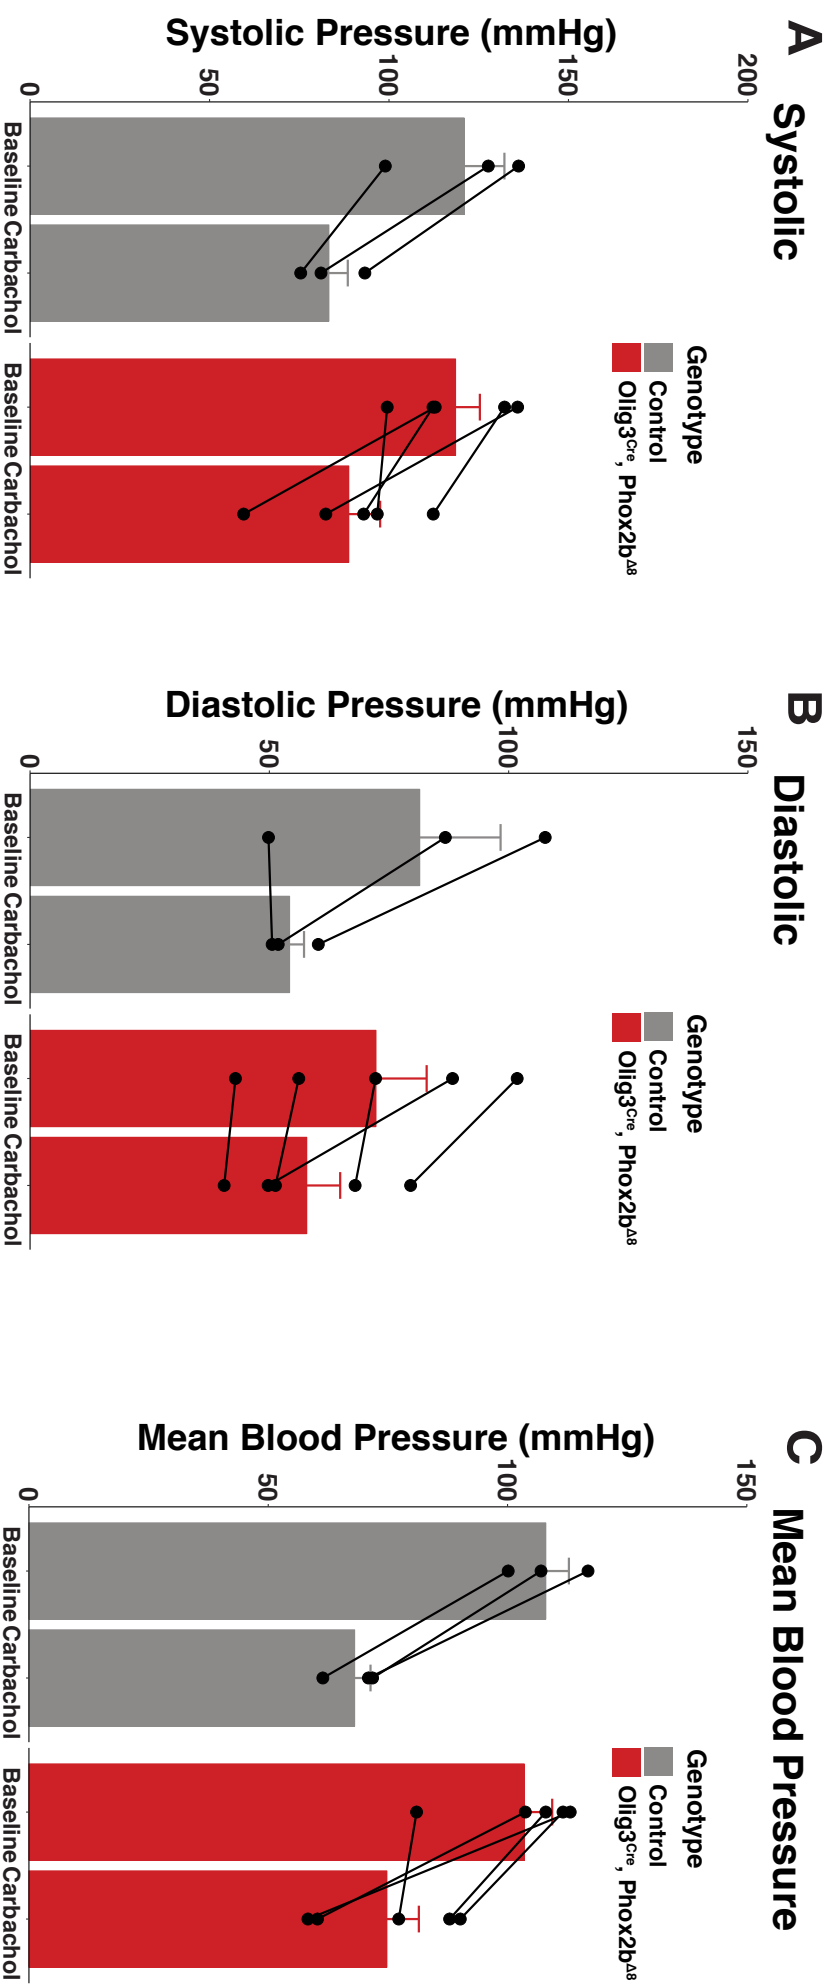

Supplement: NIHMS1659334-supplement-S9.pdf [file NIHMS1659334-supplement-S9.pdf]
