# Supplementary material for: Neonatal apneic phenotype in a murine congenital central hypoventilation syndrome model is induced through non‐cell autonomous developmental mechanisms
Source: PubMed Central journal article supplement (PMC7881415; doi:10.1111/bpa.12877), 2020-08-04

**A**

**Confusion Matrix  
From Random Forest**

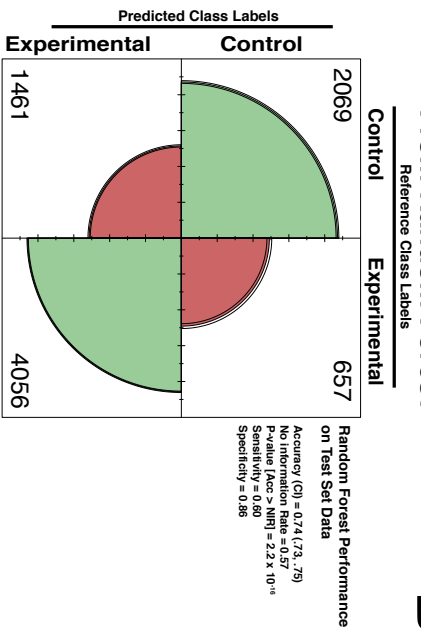

**B**

**Confusion Matrix  
From Adaboost**

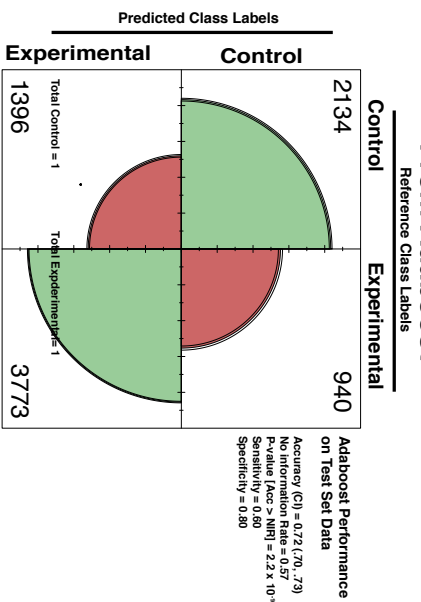

**E**

**Random Forest Feature Importance**

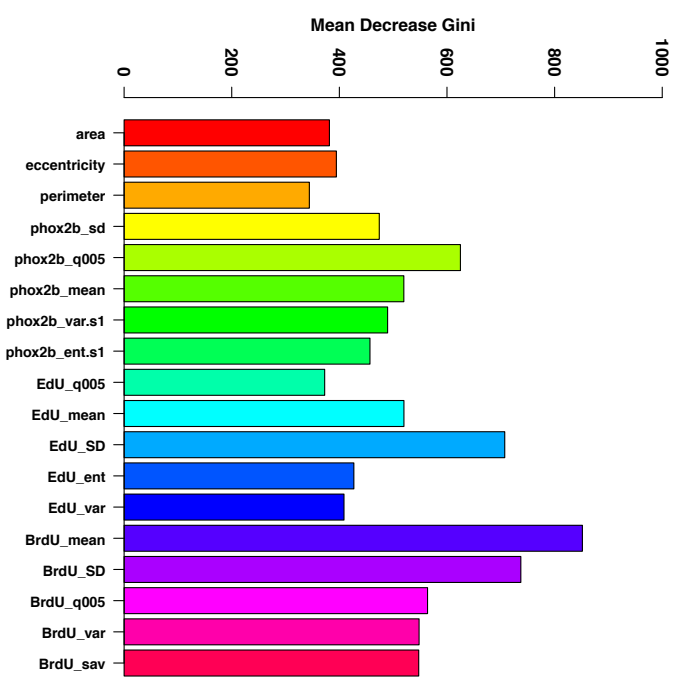

**C**

**Confusion Matrix  
From SVM**

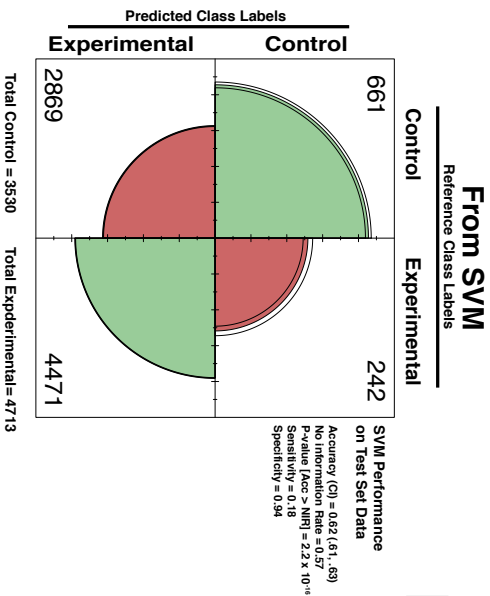

**D**

**Confusion Matrix  
From LDA**

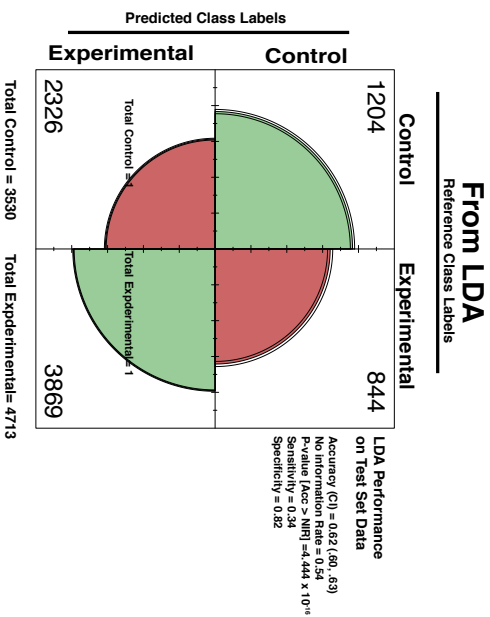

Supplement: NIHMS1659334-supplement-S10.pdf [file NIHMS1659334-supplement-S10.pdf]
